# Supplementary material for: Multi-Institutional Retrospective Case-Control Study Evaluating Clinical Outcomes of Foals with Small Intestinal Strangulating Obstruction: 2000–2020
Source: MDPI journal article supplement (doi:10.3390/ani12111374), 2022-05-27
Supplement: s1 [file s1]

**Supplementary Table S1.** Breeds of foals and adults recovered from surgery.

| <b>Breed</b>                         | <b>Foals recovered<br/>(% Short-term survival)</b> | <b>Adults recovered<br/>(% short-term survival)</b> |
|--------------------------------------|----------------------------------------------------|-----------------------------------------------------|
| Thoroughbred                         | 9 (92.3)                                           | 22 (64.3)                                           |
| Quarter Horse                        | 1 (33.0)                                           | 12 (60.0)                                           |
| Warmblood                            | 4 (57.1)                                           | 10 (90.9)                                           |
| Arabian                              | 2 (100)                                            | 7 (46.2)                                            |
| Andalusian                           | 2 (66.7)                                           | -                                                   |
| Standardbred                         | 6 (66.7)                                           | 7 (100)                                             |
| Pony                                 | -                                                  | 2 (66.7)                                            |
| Morgan                               | -                                                  | 2 (20.0)                                            |
| American Saddlebred                  | -                                                  | 2 (50.0)                                            |
| Tennessee Walking Horse              | -                                                  | 2 (100)                                             |
| Shire                                | -                                                  | 1 (100)                                             |
| Percheron                            | 1 (100)                                            | 1 (100)                                             |
| Quarab (Arabian-Quarter Horse Cross) | -                                                  | 1 (100)                                             |
| Gypsy Cob                            | -                                                  | 1 (100)                                             |

**Supplementary Table S2.** Foals recovered from surgery and case-matched adults.

| <b>Foal Lesion</b>                      | <b>Adult Lesion</b>                         |
|-----------------------------------------|---------------------------------------------|
| Intussusception                         | Strangulating lipoma                        |
|                                         | Strangulating lipoma                        |
|                                         | Strangulating lipoma                        |
| Volvulus secondary to ascarid impaction | Volvulus secondary to jejunal impaction     |
|                                         | Volvulus secondary to ileal impaction       |
|                                         | Volvulus secondary to jejunal impaction     |
| Ileus and volvulus                      | Volvulus                                    |
|                                         | Volvulus with ileus                         |
|                                         | Strangulating lipoma with volvulus          |
| Umbilical Richter's hernia              | Bilateral inguinal hernia                   |
|                                         | Left inguinal hernia                        |
|                                         | Strangulating lipoma                        |
| Intussusception                         | Gastrosplenic ligament entrapment           |
|                                         | Gastrosplenic ligament entrapment           |
|                                         | Strangulation lipoma                        |
| Segmental volvulus                      | Gastrosplenic ligament entrapment           |
|                                         | Strangulating lipoma                        |
|                                         | Strangulating lipoma                        |
| Mesenteric volvulus                     | Mesenteric rent                             |
|                                         | Mesenteric rent                             |
|                                         | Strangulating lipoma                        |
| Mesenteric volvulus                     | Mesenteric volvulus                         |
|                                         | Mesenteric volvulus                         |
|                                         | Strangulating lipoma                        |
| Umbilical Richter's hernia              | Omental rent                                |
|                                         | Segmental volvulus                          |
|                                         | Herniation through laparoscopic portal site |

|                                                                |                                                                                                                    |
|----------------------------------------------------------------|--------------------------------------------------------------------------------------------------------------------|
| Small intestinal volvulus                                      | Gastrosplenic ligament entrapment<br>Small intestinal volvulus<br>Small intestinal entrapment in abdominal wall    |
| Volvulus nodosus                                               | Strangulating lipoma<br>Mesenteric root volvulus<br>Segmental volvulus                                             |
| Segmental volvulus                                             | Mesenteric root volvulus<br>Segmental volvulus<br>Segmental volvulus                                               |
| Intussusception secondary to intraluminal hamartoma            | Adhesions and secondary volvulus<br>Segmental volvulus<br>Left inguinal hernia                                     |
| Ileal strangulation by mesodiverticular band                   | Strangulating lipoma<br>Strangulating lipoma<br>Ileal strangulation by nephrosplenic ligament rent                 |
| Mesenteric rent                                                | Volvulus secondary to adhesions<br>Volvulus<br>Strangulating lipoma                                                |
| Volvulus nodosus                                               | Segmental volvulus<br>Segmental volvulus<br>Strangulating lipoma with peritonitis                                  |
| Ileocecal intussusception                                      | Mesenteric root volvulus<br>Segmental volvulus<br>Mesoduodenal rent                                                |
| Ischemia secondary to ascarid impaction                        | Volvulus secondary to omental adhesion to jejunum<br>Segmental volvulus<br>Omental rent with jejunal incarceration |
| Segmental volvulus                                             | Gastrosplenic ligament entrapment<br>Strangulating lipoma<br>Strangulating lipoma                                  |
| Segmental volvulus                                             | Omental rent<br>Segmental volvulus<br>Strangulating lipoma                                                         |
| intussusception                                                | Segmental volvulus<br>Strangulating lipoma<br>Intussusception                                                      |
| Segmental volvulus – Necrotizing enterocolitis                 | Jejunal abscess with adhesion and secondary volvulus<br>Segmental volvulus<br>Strangulating lipoma                 |
| Volvulus                                                       | Strangulating lipoma<br>Strangulating lipoma<br>Strangulating lipoma                                               |
| Bilateral inguinal hernias (unreducible left, reducible right) | Left inguinal hernia<br>Left inguinal hernia, traumatic body wall tear<br>Left inguinal hernia                     |
| Ruptured inguinal hernia                                       | Left inguinal hernia<br>Right inguinal hernia                                                                      |

Right inguinal hernia

---
